# Supplementary material for: Globally important islands where eradicating invasive mammals will benefit highly threatened vertebrates
Source: PLoS One. 2019 Mar 27;14(3):e0212128. doi: 10.1371/journal.pone.0212128 (PMC6436766; doi:10.1371/journal.pone.0212128)
Supplement: S1 Data File — Invasive mammal species listed are only those identified as having negative impact on highly threatened species and which occur on islands that fall below island area and human population size thresholds used in the analyses. Threatened species are only those that would benefit from the eradication. Stars * reflect invasive species populations currently subject to on-going eradication efforts or awaiting determination of the outcome from a completed eradication. Island names identified as unknown are deliberate to prevent revealing locations of sensitive species. (XLSX) [file pone.0212128.s001.xlsx]

## Sheet: S1 Data file
Island name	Country or territory	Invasive vertebrate negatively impacting threatened species, and meeting eradication criteria. Asterisks reflect invasive species’ populations currently subject to on-going eradication efforts, or awaiting confirmation of the outcome.	Threatened species that would benefit from the eradication of invasive mammals	Island rank	Timeframe that eradication could be initiated
Socorro	Mexico	Felis catus*, Mus musculus	Mimus graysoni, Urosaurus auriculatus, Puffinus auricularis	1	2020
San José	Mexico	Canis familiaris, Capra hircus, Felis catus	Dipodomys insularis, Sylvilagus mansuetus	2	2020
Gough	St Helena, Ascension And Tristan Da Cunha	Mus musculus	Rowettia goughensis, Diomedea dabbenena, Phoebetria fusca, Thalassarche chlororhynchos, Pterodroma incerta	3	2020
Mona	Puerto Rico	Capra hircus, Felis catus, Rattus rattus, Sus scrofa	Agelaius xanthomus, Epicrates monensis, Cyclura stejnegeri, Spondylurus monae, Typhlops monensis	4	2020
Floreana	Ecuador	Bos taurus, Canis familiaris, Equus caballus, Felis catus, Mus musculus, Rattus rattus	Camarhynchus pauper, Pterodroma phaeopygia, Spheniscus mendiculus	5	2020
Amsterdam	French Southern Territories	Felis catus, Mus musculus, Rattus norvegicus	Diomedea amsterdamensis, Phoebetria fusca, Thalassarche carteri, Eudyptes moseleyi	6	2020
Alejandro Selkirk	Chile	Bos taurus, Capra hircus, Felis catus, Mus musculus, Rattus norvegicus, Rattus rattus	Aphrastura masafuerae	7	2020
Guadalupe	Mexico	Felis catus*, Mus musculus	Oceanodroma macrodactyla	7	2020
Niau	French Polynesia	Felis catus, Rattus rattus	Todiramphus gambieri	7	2020
Santa Margarita	Mexico	Capra hircus, Felis catus	Dipodomys margaritae	7	2020
<unnamed island>	US Virgin Islands	Rattus rattus*	Spondylurus magnacruzae, Ameiva polops	18	2020
Sarigan	Northern Mariana Islands	Felis catus, Rattus sp.	Ptilinopus roseicapilla, Megapodius laperouse, Cleptornis marchei, Zosterops conspicillatus, Emoia slevini	20	2020
Cabritos	Dominican Republic	Bos taurus*, Equus asinus*, Felis catus*, Rattus rattus	Cyclura ricordii	21	2020
San Esteban	Mexico	Rattus rattus	Peromyscus stephani	21	2020
Mejía	Mexico	Mus musculus, Rattus rattus	Peromyscus guardia	33	2020
<unnamed island>	US Virgin Islands	Rattus rattus	Ameiva polops	33	2020
Santa Luzia	Cape Verde	Felis catus*, Mus sp.	Hemidactylus bouvieri	41	2020
Midway Atoll (Sand)	USA	Mus musculus	Anas laysanensis	44	2020
<unnamed island>	British Virgin Islands	Capra hircus, Rattus rattus	Spondylurus sloanii	47	2020
Tiejien (Tiejian) Islet	Taiwan, Province Of China	Rattus losea	Sterna bernsteini	47	2020
<unnamed island>	Bermuda	Rattus rattus*	Plestiodon longirostris, Pterodroma cahow	52	2020
<unnamed island>	Bermuda	Rattus rattus*	Plestiodon longirostris, Pterodroma cahow	52	2020
<unnamed island>	Bermuda	Rattus norvegicus*, Rattus rattus*	Plestiodon longirostris, Pterodroma cahow	52	2020
Mohotani	French Polynesia	Felis catus, Ovis aries, Rattus exulans	Pomarea mendozae, Nesofregetta fuliginosa	55	2020
Lord Howe	Australia	Bos taurus, Canis familiaris, Rattus rattus	Gallirallus sylvestris	56	2020
Nanuya Levu	Fiji	Felis catus, Rattus rattus	Brachylophus vitiensis	56	2020
<unnamed island>	Bermuda	Rattus rattus*	Plestiodon longirostris	56	2020
<unnamed island>	Bermuda	Rattus norvegicus, Rattus rattus	Plestiodon longirostris	56	2020
Asuncion	Northern Mariana Islands	Rattus exulans, Rattus sp.	Megapodius laperouse, Pteropus mariannus, Emoia slevini	75	2020
María Cleofas	Mexico	Capra hircus*, Felis catus*, Rattus rattus	Peromyscus madrensis, Sylvilagus graysoni, Myotis findleyi	79	2020
María Magdalena	Mexico	Capra hircus, Felis catus, Odocoileus virginianus, Rattus rattus	Peromyscus madrensis, Sylvilagus graysoni, Myotis findleyi	79	2020
Espartar	Spain	Oryctolagus cuniculus	Puffinus mauretanicus	86	2020
Tagomago	Spain	Capra hircus, Felis catus, Rattus rattus	Puffinus mauretanicus	86	2020
Cayo La Loma	Cuba	Rattus rattus	Mesocapromys angelcabrerai	91	2020
San Diego	Mexico	Capra hircus	Peromyscus sejugis	91	2020
Vanderlin	Australia	Bos taurus, Canis familiaris, Felis catus	Dasyurus hallucatus, Pseudantechinus mimulus	102	2020
<unnamed island>	Fiji	Sus scrofa	Emoia mokosariniveikau	104	2020
Late	Tonga	Rattus rattus, Sus scrofa	Megapodius pritchardii	104	2020
<unnamed island>	Turks And Caicos Islands	Bos taurus, Capra hircus	Cyclura carinata	109	2020
<unnamed island>	Turks And Caicos Islands	Felis catus, Rattus rattus	Cyclura carinata	109	2020
<unnamed island>	The Bahamas	Rattus rattus	Cyclura carinata	109	2020
<unnamed island>	Turks And Caicos Islands	Felis catus, Rattus rattus	Cyclura carinata	109	2020
East Bay	Turks And Caicos Islands	Capra hircus, Rattus rattus	Cyclura carinata	109	2020
<unnamed island>	Turks And Caicos Islands	Rattus rattus	Cyclura carinata	109	2020
<unnamed island>	Turks And Caicos Islands	Felis catus, Rattus rattus	Cyclura carinata	109	2020
<unnamed island>	Turks And Caicos Islands	Felis catus, Rattus rattus	Cyclura carinata	109	2020
Cayo Fragoso	Cuba	Rattus rattus	Mesocapromys auritus	128	2020
Cayo la Sagra	Cuba	Rattus rattus	Mesocapromys auritus	128	2020
Cayo Pajonal	Cuba	Rattus rattus	Mesocapromys auritus	128	2020
Cayo Pasaje	Cuba	Rattus rattus	Mesocapromys auritus	128	2020
Centre	Australia	Canis familiaris	Pseudantechinus mimulus	128	2020
South-west Island	Australia	Canis familiaris, Felis catus	Pseudantechinus mimulus	128	2020
Saint-Paul	French Southern Territories	Mus musculus	Phoebetria fusca, Thalassarche carteri	138	2020
<unnamed island>	Portugal	Rattus rattus*	Podarcis carbonelli	139	2020
<unnamed island>	Puerto Rico	Felis catus, Rattus rattus	Spondylurus nitidus	139	2020
Cayo Norte	Puerto Rico	Capra hircus, Rattus sp.	Spondylurus nitidus	139	2020
Rimatara	French Polynesia	Bos taurus, Canis familiaris, Capra hircus, Equus caballus, Felis catus, Rattus exulans, Rattus norvegicus	Vini kuhlii	139	2020
Green Rock	Bermuda	Rattus rattus	Pterodroma cahow	148	2020
Lehua	USA	Rattus exulans*	Puffinus newelli	148	2020
Long Rock	Bermuda	Rattus rattus*	Pterodroma cahow	148	2020
Reitoru	French Polynesia	Rattus exulans	Prosobonia cancellata	148	2020
Tahanea	French Polynesia	Rattus sp.	Prosobonia cancellata	148	2020
Auckland	New Zealand	Felis catus, Sus scrofa	Eudyptes sclateri, Megadyptes antipodes	155	2020
<unnamed island>	New Caledonia	Rattus exulans	Phoboscincus bocourti	156	2020
Logie (Lougie)	Ecuador	Rattus rattus	Spheniscus mendiculus	156	2020
<unnamed island>	New Caledonia	Rattus exulans	Phoboscincus bocourti	156	2020
Hatu Iti (Motu Iti)	French Polynesia	Rattus exulans	Nesofregetta fuliginosa, Pterodroma alba	167	2020
Motu Oa	French Polynesia	Rattus exulans	Nesofregetta fuliginosa, Pterodroma alba	167	2020
Swains	American Samoa	Felis catus	Emoia adspersa	169	2020
Wakaya	Fiji	Axis axis, Canis familiaris, Capra hircus, Felis catus, Sus scrofa	Brachylophus bulabula	179	2020
Marion	South Africa	Mus musculus	Phoebetria fusca, Thalassarche chrysostoma	183	2020
<unnamed island>	The Bahamas	Rattus sp.	Cyclura rileyi	190	2020
<unnamed island>	The Bahamas	Rattus rattus	Cyclura rileyi	190	2020
<unnamed island>	The Bahamas	Rattus rattus	Cyclura rileyi	190	2020
<unnamed island>	The Bahamas	Rattus rattus	Cyclura rileyi	190	2020
<unnamed island>	The Bahamas	Rattus rattus	Cyclura rileyi	190	2020
Jutten	South Africa	Oryctolagus cuniculus	Phalacrocorax capensis, Phalacrocorax neglectus, Spheniscus demersus	197	2020
Chincha Norte	Peru	Felis catus, Rattus sp.	Pelecanoides garnotii	199	2020
Lobos de Tierra	Peru	Canis familiaris, Felis catus	Pelecanoides garnotii	199	2020
Pajaros Uno	Chile	Rattus sp.	Pelecanoides garnotii	199	2020
Jarvis	United States Minor Outlying Islands	Mus musculus	Nesofregetta fuliginosa	204	2020
Terre de Bas	Guadeloupe	Rattus rattus	Iguana delicatissima	204	2020
<unnamed island>	Guadeloupe	Rattus rattus	Iguana delicatissima	204	2020
Canton (Kanton)	Kiribati	Felis catus, Rattus exulans, Rattus rattus	Pterodroma alba	217	2020
Enderbury	Kiribati	Rattus exulans	Pterodroma alba	217	2020
Fatu Huku	French Polynesia	Rattus exulans	Pterodroma alba	217	2020
Hatutaa	French Polynesia	Rattus exulans	Pterodroma alba	217	2020
Malden	Kiribati	Felis catus, Mus musculus	Pterodroma alba	217	2020
Anatahan	Northern Mariana Islands	Felis catus, Rattus exulans, Sus scrofa*	Megapodius laperouse, Pteropus mariannus	226	2020
Navutu-i-Loma	Fiji	Rattus norvegicus, Rattus rattus	Emoia trossula	234	2020
East Maug	Northern Mariana Islands	Rattus exulans	Megapodius laperouse, Pteropus mariannus	245	2020
Guguan	Northern Mariana Islands	Rattus exulans	Megapodius laperouse, Pteropus mariannus	245	2020
North Maug	Northern Mariana Islands	Rattus exulans	Megapodius laperouse, Pteropus mariannus	245	2020
West Maug	Northern Mariana Islands	Rattus exulans	Megapodius laperouse, Pteropus mariannus	245	2020
Farallon de Medinilla	Northern Mariana Islands	Rattus sp.	Megapodius laperouse	249	2020
Kayangel	Palau	Canis familiaris, Felis catus, Rattus exulans	Megapodius laperouse	249	2020
Paryadin Peninsula North Island 2	South Georgia and the South Sandwich Islands	Rattus norvegicus*	Thalassarche chrysostoma	256	2020
Paryadin Peninsula North Island 3	South Georgia and the South Sandwich Islands	Rattus norvegicus*	Thalassarche chrysostoma	256	2020
Paryadin Peninsula South Island 3	South Georgia and the South Sandwich Islands	Rattus norvegicus*	Thalassarche chrysostoma	256	2020
South Georgia	South Georgia and the South Sandwich Islands	Mus musculus*, Rangifer tarandus*, Rattus norvegicus*	Thalassarche chrysostoma	256	2020
Coronado Sur	Mexico	Mus musculus	Oceanodroma homochroa	260	2020
Southeast Farallon	USA	Mus musculus	Oceanodroma homochroa	260	2020
West End	USA	Mus musculus	Oceanodroma homochroa	260	2020
Slipper	New Zealand	Rattus exulans	Charadrius obscurus	266	2020
Dragonada	Greece	Canis familiaris, Rattus sp.*	Podarcis cretensis	273	2020
<unnamed island>	Greece	Rattus sp.*	Podarcis cretensis	273	2020
<unnamed island>	Greece	Rattus sp.*	Podarcis cretensis	273	2020
Cayo Maja 3	Cuba	Felis catus, Rattus rattus	Mysateles garridoi	7	2030
Robinson Crusoe	Chile	Bos taurus, Capra hircus, Felis catus, Mus musculus, Nasua nasua, Oryctolagus cuniculus, Rattus norvegicus, Rattus rattus	Sephanoides fernandensis	7	2030
Alamagan	Northern Mariana Islands	Bos taurus, Canis familiaris, Capra hircus, Felis catus, Rattus exulans, Sus scrofa	Megapodius laperouse, Acrocephalus luscinius, Pteropus mariannus, Emoia slevini	19	2030
<unnamed island>	Honduras	Canis familiaris, Felis catus, Rattus rattus	Ctenosaura melanosterna	21	2030
Culebrita	Puerto Rico	Capra hircus, Felis catus, Rattus rattus	Spondylurus culebrae	21	2030
Mocha	Chile	Canis familiaris, Felis catus, Mus musculus, Rattus norvegicus, Rattus rattus	Octodon pacificus	21	2030
Plata	Ecuador	Mus musculus, Rattus rattus	Phoebastria irrorata	21	2030
Silhouette	Seychelles	Felis catus, Rattus rattus	Coleura seychellensis, Janetaescincus braueri, Janetaescincus veseyfitzgeraldi	29	2030
Guana	British Virgin Islands	Canis familiaris, Felis catus, Ovis aries, Rattus sp.	Cyclura pinguis, Spondylurus semitaeniatus	38	2030
Pagan	Northern Mariana Islands	Bos taurus, Capra hircus, Felis catus, Rattus norvegicus, Rattus rattus, Sus scrofa	Megapodius laperouse, Pteropus mariannus, Emoia slevini	43	2030
Anegada	British Virgin Islands	Bos taurus, Canis familiaris, Capra hircus, Equus asinus, Felis catus, Ovis aries, Rattus norvegicus, Rattus rattus, Sus scrofa	Cyclura pinguis	44	2030
Jongdao (Zhong Dao) 1	Taiwan, Province Of China	Rattus losea	Sterna bernsteini	47	2030
<unnamed island>	Fiji	Felis catus	Brachylophus vitiensis	56	2030
Makatea	French Polynesia	Felis catus, Rattus exulans, Rattus rattus	Ducula aurorae	56	2030
<unnamed island>	Fiji	Capra hircus, Felis catus	Brachylophus vitiensis	56	2030
Grande Terre (Aldabra Atoll)	Seychelles	Felis catus, Rattus rattus	Ardeola idae, Threskiornis bernieri	78	2030
Cabrera Gran	Spain	Canis familiaris, Felis catus, Genetta genetta, Mus musculus, Mustela nivalis, Oryctolagus cuniculus, Rattus rattus	Puffinus mauretanicus, Podarcis lilfordi	84	2030
Conillera	Spain	Oryctolagus cuniculus*, Rattus rattus*	Puffinus mauretanicus	86	2030
Espalmador	Spain	Felis catus, Oryctolagus cuniculus, Rattus rattus	Puffinus mauretanicus	86	2030
Barbareta	Honduras	Bos taurus, Canis familiaris, Rattus sp.	Ctenosaura oedirhina	91	2030
St Paul	USA	Felis catus	Sorex pribilofensis	91	2030
Niuafou	Tonga	Canis familiaris, Felis catus, Rattus exulans, Sus scrofa	Megapodius pritchardii, Emoia adspersa	99	2030
Great Barrier (Aotea)	New Zealand	Felis catus, Mus musculus, Rattus exulans, Rattus rattus, Sus scrofa	Anas chlorotis, Botaurus poiciloptilus, Nestor meridionalis	126	2030
Kawau	New Zealand	Felis catus, Mus musculus, Mustela erminea, Rattus rattus, Trichosurus vulpecula	Apteryx mantelli	127	2030
<unnamed island>	New Caledonia	Felis catus, Rattus exulans, Rattus rattus	Phoboscincus bocourti	128	2030
Henderson	Pitcairn	Rattus exulans	Pterodroma atrata	139	2030
Maria	Australia	Canis familiaris, Felis catus, Rattus norvegicus, Rattus rattus	Pardalotus quadragintus	139	2030
Great Dog	British Virgin Islands	Capra hircus, Rattus rattus	Eleutherodactylus schwartzi	148	2030
<unnamed island>	Cuba	Rattus rattus	Sphaerodactylus storeyae	156	2030
Cayo Largo del Sur	Cuba	Rattus rattus	Sphaerodactylus storeyae	156	2030
<unnamed island>	New Caledonia	Rattus exulans	Phoboscincus bocourti	156	2030
Nukunono	Tokelau	Felis catus	Emoia adspersa	169	2030
l'Est	French Southern Territories	Oryctolagus cuniculus	Phoebetria fusca, Thalassarche chrysostoma	175	2030
Possession	French Southern Territories	Rattus rattus	Phoebetria fusca, Thalassarche chrysostoma	175	2030
Galoa	Fiji	Felis catus, Sus scrofa	Platymantis vitianus, Emoia trossula	177	2030
Robben	South Africa	Felis catus*, Oryctolagus cuniculus*, Rattus rattus	Phalacrocorax capensis, Phalacrocorax neglectus, Spheniscus demersus	178	2030
Vuaqava	Fiji	Capra hircus, Felis catus	Emballonura semicaudata, Brachylophus fasciatus	184	2030
Vatu Varu	Fiji	Rattus sp.	Emballonura semicaudata, Brachylophus fasciatus, Emoia trossula	185	2030
Qamea	Fiji	Canis familiaris, Felis catus, Sus scrofa	Brachylophus fasciatus, Emoia trossula	186	2030
San Salvador	The Bahamas	Canis familiaris, Felis catus, Rattus rattus	Cyclura rileyi	190	2030
Agrihan (Agrigan)	Northern Mariana Islands	Bos taurus, Canis familiaris, Capra hircus, Felis catus, Rattus exulans, Rattus rattus, Rattus sp., Sus scrofa	Megapodius laperouse, Pteropus mariannus	196	2030
Pan de Azucar	Chile	Rattus sp.	Pelecanoides garnotii	199	2030
Ogea Driki	Fiji	Felis catus	Emballonura semicaudata, Brachylophus fasciatus	212	2030
Ngeruktabel	Palau	Felis catus, Rattus sp.	Megapodius laperouse, Emballonura semicaudata	223	2030
Dia	Greece	Canis familiaris, Felis catus, Rattus sp.	Podarcis cretensis	228	2030
Arno	Marshall Islands	Felis catus, Rattus exulans, Rattus rattus, Sus scrofa	Perochirus ateles, Emoia boettgeri	231	2030
Mago	Fiji	Bos taurus, Canis familiaris, Capra hircus, Felis catus, Sus scrofa	Brachylophus fasciatus	234	2030
Euidelchol	Palau	Rattus sp.	Megapodius laperouse	249	2030
Ngercheu	Palau	Rattus sp.	Megapodius laperouse	249	2030
Ngerukewid Group	Palau	Rattus sp.	Megapodius laperouse	249	2030
Ulebsechel	Palau	Rattus sp.	Megapodius laperouse	249	2030
Ulong	Palau	Rattus sp.	Megapodius laperouse	249	2030
San Miguel	USA	Rattus rattus	Oceanodroma homochroa	260	2030
Motukawanui	New Zealand	Rattus exulans	Charadrius obscurus	266	2030
Schaapen	South Africa	Oryctolagus cuniculus	Phalacrocorax capensis	268	2030
<unnamed island>	Greece	Rattus sp.	Podarcis cretensis	273	2030
<unnamed island>	Greece	Rattus sp.	Podarcis cretensis	273	2030
<unnamed island>	Greece	Rattus sp.	Podarcis cretensis	273	2030
<unnamed island>	Greece	Rattus sp.	Podarcis cretensis	273	2030
<unnamed island>	Greece	Rattus sp.	Podarcis cretensis	273	2030
<unnamed island>	Greece	Rattus sp.	Podarcis cretensis	273	2030
<unnamed island>	Greece	Rattus sp.	Podarcis cretensis	273	2030
Fatu Hiva	French Polynesia	Capra hircus, Felis catus, Rattus exulans, Rattus rattus	Pomarea whitneyi	7	not in forseeable future
Tahuata	French Polynesia	Capra hircus, Felis catus, Rattus rattus, Sus scrofa	Todiramphus godeffroyi	7	not in forseeable future
Pitt	New Zealand	Felis catus, Mus musculus, Sus scrofa	Haematopus chathamensis, Diomedea sanfordi, Phalacrocorax featherstoni, Phalacrocorax onslowi, Pterodroma axillaris	31	not in forseeable future
<unnamed island>	British Virgin Islands	Rattus rattus	Eleutherodactylus schwartzi, Cyclura pinguis, Spondylurus semitaeniatus	32	not in forseeable future
Vulcano	Italy	Rattus rattus	Podarcis raffonei	33	not in forseeable future
Ua Huka	French Polynesia	Capra hircus, Felis catus, Rattus exulans, Rattus rattus, Sus scrofa	Ducula galeata, Vini ultramarina	46	not in forseeable future
Nacula	Fiji	Canis familiaris, Capra hircus, Felis catus	Brachylophus vitiensis	56	not in forseeable future
Naviti	Fiji	Canis familiaris, Capra hircus, Felis catus	Brachylophus vitiensis	56	not in forseeable future
Pitcairn	Pitcairn	Capra hircus, Rattus exulans	Acrocephalus vaughani	56	not in forseeable future
Waya	Fiji	Canis familiaris, Capra hircus, Felis catus	Brachylophus vitiensis	56	not in forseeable future
Tristan da Cunha	St Helena, Ascension And Tristan Da Cunha	Bos taurus, Canis familiaris, Equus asinus, Mus musculus, Ovis aries, Rattus rattus	Phoebetria fusca, Thalassarche chlororhynchos, Pterodroma incerta, Eudyptes moseleyi	77	not in forseeable future
Tau	American Samoa	Felis catus, Rattus norvegicus, Rattus rattus, Sus scrofa	Emoia lawesi, Emoia samoensis	85	not in forseeable future
Bruny	Australia	Canis familiaris, Felis catus	Pardalotus quadragintus, Sarcophilus harrisii	98	not in forseeable future
Ginger	British Virgin Islands	Capra hircus	Spondylurus semitaeniatus	101	not in forseeable future
Ponui	New Zealand	Felis catus, Mustela erminea, Ovis aries, Rattus norvegicus, Rattus rattus, Sus scrofa	Apteryx mantelli, Charadrius obscurus	108	not in forseeable future
East Caicos	Turks And Caicos Islands	Bos taurus, Equus asinus, Felis catus, Rattus rattus	Cyclura carinata	109	not in forseeable future
Pine Cay	Turks And Caicos Islands	Felis catus, Rattus rattus	Cyclura carinata	109	not in forseeable future
Kimolos	Greece	Felis catus	Macrovipera schweizeri	128	not in forseeable future
Akamaru	French Polynesia	Capra hircus, Felis catus, Rattus exulans, Rattus rattus	Pterodroma atrata	139	not in forseeable future
Bartolomé	Ecuador	Rattus rattus	Spheniscus mendiculus	156	not in forseeable future
Cikobia	Fiji	Capra hircus, Felis catus, Sus scrofa	Emballonura semicaudata, Brachylophus fasciatus, Emoia trossula	165	not in forseeable future
<unnamed island>	Fiji	Felis catus	Brachylophus bulabula	179	not in forseeable future
<unnamed island>	Fiji	Sus scrofa	Brachylophus bulabula	179	not in forseeable future
Namuka-I-Lau	Fiji	Canis familiaris, Felis catus	Brachylophus fasciatus, Emoia trossula	186	not in forseeable future
Dassen	South Africa	Oryctolagus cuniculus	Phalacrocorax capensis, Phalacrocorax neglectus, Spheniscus demersus	197	not in forseeable future
Cochons	French Southern Territories	Felis catus, Mus musculus, Oryctolagus cuniculus	Phoebetria fusca	199	not in forseeable future
Anchorage	New Zealand	Felis catus, Rattus norvegicus, Rattus rattus	Megadyptes antipodes	204	not in forseeable future
Bravo	New Zealand	Rattus exulans, Rattus norvegicus, Rattus rattus	Megadyptes antipodes	204	not in forseeable future
Crayfish	New Zealand	Rattus exulans, Rattus norvegicus, Rattus rattus	Megadyptes antipodes	204	not in forseeable future
Noble	New Zealand	Rattus norvegicus, Rattus rattus	Megadyptes antipodes	204	not in forseeable future
Cicia	Fiji	Felis catus, Sus scrofa	Emballonura semicaudata, Emoia trossula	212	not in forseeable future
Kabara	Fiji	Canis familiaris, Felis catus	Emballonura semicaudata, Brachylophus fasciatus	212	not in forseeable future
Vanua Vatu	Fiji	Canis familiaris, Felis catus	Emballonura semicaudata, Brachylophus fasciatus	212	not in forseeable future
Motu Mokohe	French Polynesia	Rattus exulans, Rattus rattus	Pterodroma alba	217	not in forseeable future
Peleliu	Palau	Canis familiaris, Felis catus, Rattus sp., Sus scrofa	Megapodius laperouse, Emballonura semicaudata	223	not in forseeable future
Corvo	Portugal	Felis catus, Rattus rattus	Pipistrellus sp. (possible maderensis)	227	not in forseeable future
Chrysi	Greece	Canis familiaris, Felis catus, Rattus sp.	Podarcis cretensis	228	not in forseeable future
Doi	Fiji	Felis catus, Sus scrofa	Emoia trossula	234	not in forseeable future
Fulaga	Fiji	Canis familiaris, Cat sp, Rattus sp., Sus scrofa	Brachylophus fasciatus	234	not in forseeable future
Oneata	Fiji	Canis familiaris, Capra hircus, Felis catus, Sus scrofa	Brachylophus fasciatus	234	not in forseeable future
Ono-i-lau	Fiji	Felis catus, Rattus sp., Sus scrofa	Emoia trossula	234	not in forseeable future
Marcus	South Africa	Rattus sp.	Phalacrocorax capensis, Phalacrocorax neglectus	244	not in forseeable future
Bird	South Africa	Rattus rattus	Phalacrocorax capensis	268	not in forseeable future
<unnamed island>	Spain	Rattus rattus	Podarcis lilfordi	271	not in forseeable future
<unnamed island>	Greece	Rattus sp.	Podarcis cretensis	273	not in forseeable future
<unnamed island>	Greece	Canis familiaris, Rattus sp.	Podarcis cretensis	273	not in forseeable future
Elasa	Greece	Rattus sp.	Podarcis cretensis	273	not in forseeable future
<unnamed island>	Greece	Rattus sp.	Podarcis cretensis	273	not in forseeable future
Koufonisi	Greece	Rattus sp.	Podarcis cretensis	273	not in forseeable future
