# Supplementary material for: Globally important islands where eradicating invasive mammals will benefit highly threatened vertebrates
Source: PLoS One. 2019 Mar 27;14(3):e0212128. doi: 10.1371/journal.pone.0212128 (PMC6436766; doi:10.1371/journal.pone.0212128)
Supplement: S2 Data File — Invasive mammal species listed are only those identified as having negative impact on highly threatened species and fall below island area and human population size thresholds used in the analyses. Threatened species are only those that would benefit from the eradication. Island names identified as unknown are deliberate to prevent revealing locations of sensitive species. (XLSX) [file pone.0212128.s002.xlsx]

## Sheet: S2 Data file
Island name	Country or territory	Invasive vertebrate negatively impacting threatened species and meeting technical eradication criteria, but no socio-political feasibility assessment was obtained during this study	Threatened species that would benefit from the eradication of invasive mammals
Terre-de-Haut	Guadalupe	Capra hircus, Ovis aries	Alsophis sanctonum
Padar	Indonesia	Canis familiaris, Rattus spp.	Cacatua sulphurea
Great Camanoe	British Virgin Islands	Capra hircus, Felis catus, Rattus rattus	Epicrates monensis, Spondylurus semitaeniatus
Bugsuk	Philippines	Rattus exulans	Cacatua haematuropygia
Pandanan	Philippines	Rattus spp.	Cacatua haematuropygia
Tiedun Dao	China	Rattus argentiventer	Sterna bernsteini
Aire	Spain	Oryctolagus cuniculus	Puffinus mauretanicus
Escudo de Veraguas	Panama	Canis familiaris, Felis catus	Bradypus pygmaeus
Beata	Dominican Republic	Felis catus, Rattus spp.	Eleutherodactylus alcoae
Hahajima	Japan	Canis familiaris, Felis catus	Pteropus pselaphon
Aguiguan	Northern Mariana Islands	Capra hircus, Rattus exulans	Collocalia bartschi, Ptilinopus roseicapilla, Megapodius laperouse, Emballonura semicaudata
Bubuan	Philippines	Rattus spp.	Brachymeles vermis, Ramphotyphlops suluensis
Olosega	American Samoa	Felis catus, Rattus rattus, Sus scrofa	Emoia lawesi
Nu'utele	Samoa	Rattus exulans	Didunculus strigirostris
Salt Cay	Turks and Caicos Islands	Bos taurus, Capra hircus, Equus asinus, Equus caballus, Felis catus, Rattus rattus	Cyclura carinata
Dellis cay	Turks and Caicos Islands	Canis familiaris, Capra hircus, Felis catus, Rattus rattus	Cyclura carinata
<unnamed island>	Turks and Caicos Islands	Rattus rattus	Cyclura carinata
Gebe	Indonesia	Sus scrofa	Phalanger alexandrae
Salt	British Virgin Islands	Felis catus, Rattus rattus	Spondylurus semitaeniatus, Spondylurus sloanii
Cayo Juan Garcia	Cuba	Rattus rattus	Mesocapromys sanfelipensis
<unnamed island>	Martinique	Rattus norvegicus, Rattus rattus	Liophis cursor
Union	Saint Vincent and The Grenadines	Capra hircus, Sus scrofa	Gonatodes daudini
Cayo Grande	Honduras	Bos taurus, Canis familiaris, Capra hircus, Felis catus, Rattus rattus	Ctenosaura melanosterna
Norman	British Virgin Islands	Capra hircus, Rattus rattus	Cyclura pinguis, Spondylurus sloanii
<unnamed island>	US Virgin Islands	Rattus rattus	Ameiva polops
Mangrove Cay	The Bahamas	Felis catus, Rattus rattus	Icterus northropi
Santa Maria	Chile	Canis familiaris	Sterna lorata
<unnamed island>	British Virgin Islands	Rattus rattus	Cyclura pinguis, Spondylurus semitaeniatus
Narcondam	India	Capra hircus, Felis catus	Aceros narcondami
Peter	British Virgin Islands	Felis catus, Rattus rattus	Spondylurus sloanii
Water Island	US Virgin Islands	Canis familiaris, Felis catus, Rattus spp.	Spondylurus sloanii
Anatom (Aneityum)	Vanauatu	Felis catus, Rattus rattus, Sus scrofa	Emoia aneityumensis
Tioman	Malaysia	Felis catus	Popeia buniana
Iwo Jima (Iwo To)	Japan	Felis catus	Pteropus pselaphon
Chichijima	Japan	Capra hircus	Pteropus pselaphon
Major Hill Cay	Turks and Caicos Islands	Capra hircus, Rattus rattus	Cyclura carinata
<unnamed island>	British Virgin Islands	Rattus rattus	Cyclura pinguis, Spondylurus semitaeniatus
<unnamed island>	Federated States of Micronesia	Sus scrofa	Emoia boettgeri
Mangrove Cay	Turks and Caicos Islands	Felis catus, Rattus rattus	Cyclura carinata
Yaqeta	Fiji	Capra hircus	Emballonura semicaudata
<unnamed island>	Federated States of Micronesia	Felis catus, Rattus spp., Sus scrofa	Perochirus ateles, Emoia boettgeri
<unnamed island>	Federated States of Micronesia	Felis catus, Rattus rattus, Sus scrofa	Perochirus ateles, Emoia boettgeri
Ogea Levu	Fiji	Canis familiaris, Felis catus, Sus scrofa	Brachylophus fasciatus
Moce	Fiji	Canis familiaris, Felis catus, Sus scrofa	Brachylophus fasciatus
Yacata	Fiji	Canis familiaris, Felis catus	Brachylophus fasciatus
Nayau	Fiji	Canis familiaris, Felis catus, Sus scrofa	Emballonura semicaudata, Brachylophus fasciatus
<unnamed island>	Federated States of Micronesia	Felis catus, Rattus rattus	Emoia boettgeri
<unnamed island>	Martinique	Canis familiaris, Felis catus, Ovis aries, Rattus spp.	Iguana delicatissima
Meeuw	South Africa	Oryctolagus cuniculus	Phalacrocorax capensis
<unnamed island>	Spain	Rattus rattus	Podarcis lilfordi
Rotuma	Fiji	Capra hircus	Emballonura semicaudata
Falalap	Federated States of Micronesia	Canis familiaris, Felis catus	Pteropus mariannus
Asor	Federated States of Micronesia	Canis familiaris, Felis catus	Pteropus mariannus
Fossarai	Federated States of Micronesia	Canis familiaris, Felis catus	Pteropus mariannus
Mogmog	Federated States of Micronesia	Canis familiaris, Felis catus	Pteropus mariannus
Naitauba	Fiji	Canis familiaris, Equus caballus, Felis catus	Brachylophus fasciatus
<unnamed island>	Fiji	Capra hircus	Emballonura semicaudata, Brachylophus fasciatus, Emoia trossula
McCartney Cay	Turks and Caicos Islands	Felis catus	Cyclura carinata
Robbins	Australia	Bos taurus, Felis catus, Vulpes vulpes	Sarcophilus harrisii
Montaña Clara	Spain	Felis catus	Crocidura canariensis
Ni'ihau	United States	Felis catus, Mus musculus, Rattus exulans, Rattus norvegicus, Rattus rattus, Sus scrofa	Anas wyvilliana
Atiu	Cook Islands	Bos taurus, Canis familiaris, Capra hircus, Felis catus, Rattus exulans, Rattus spp., Sus scrofa	Vini kuhlii
Curieuse	Seychelles	Rattus rattus	Janetaescincus veseyfitzgeraldi
Angaur	Palau	Canis familiaris, Felis catus, Rattus spp., Sus scrofa	Megapodius laperouse, Emballonura semicaudata
Scrub	Anguilla	Capra hircus, Rattus spp.	Alsophis rijgersmaei
Joe Grants Cay	Turks and Caicos Islands	Capra hircus, Felis catus, Rattus rattus	Cyclura carinata
Pukapuka(Wale)	Cook Islands	Sus scrofa	Emoia adspersa
Tokashikijima	Japan	Felis catus	Goniurosaurus kuroiwae
Akajima	Japan	Felis catus	Goniurosaurus kuroiwae
Tonakijima	Japan	Felis catus	Goniurosaurus kuroiwae
Makogai	Fiji	Canis familiaris, Felis catus, Rattus rattus, Sus scrofa	Brachylophus bulabula
Mali	Fiji	Canis familiaris, Felis catus	Brachylophus fasciatus, Emoia trossula
<unnamed island>	Fiji	Capra hircus	Brachylophus fasciatus, Emoia trossula
North	Australia	Bos taurus	Pseudantechinus mimulus
